# Supplementary material for: Peanut skin extract ameliorates the symptoms of type 2 diabetes mellitus in mice by alleviating inflammation and maintaining gut microbiota homeostasis
Source: publisher site journal article supplement (doi:10.18632/aging.103521), 2020-07-22
Supplement: Supplementary file [file aging-v12i14-103521-supplementary-material-SD2.pdf]

## SUPPLEMENTARY FIGURES

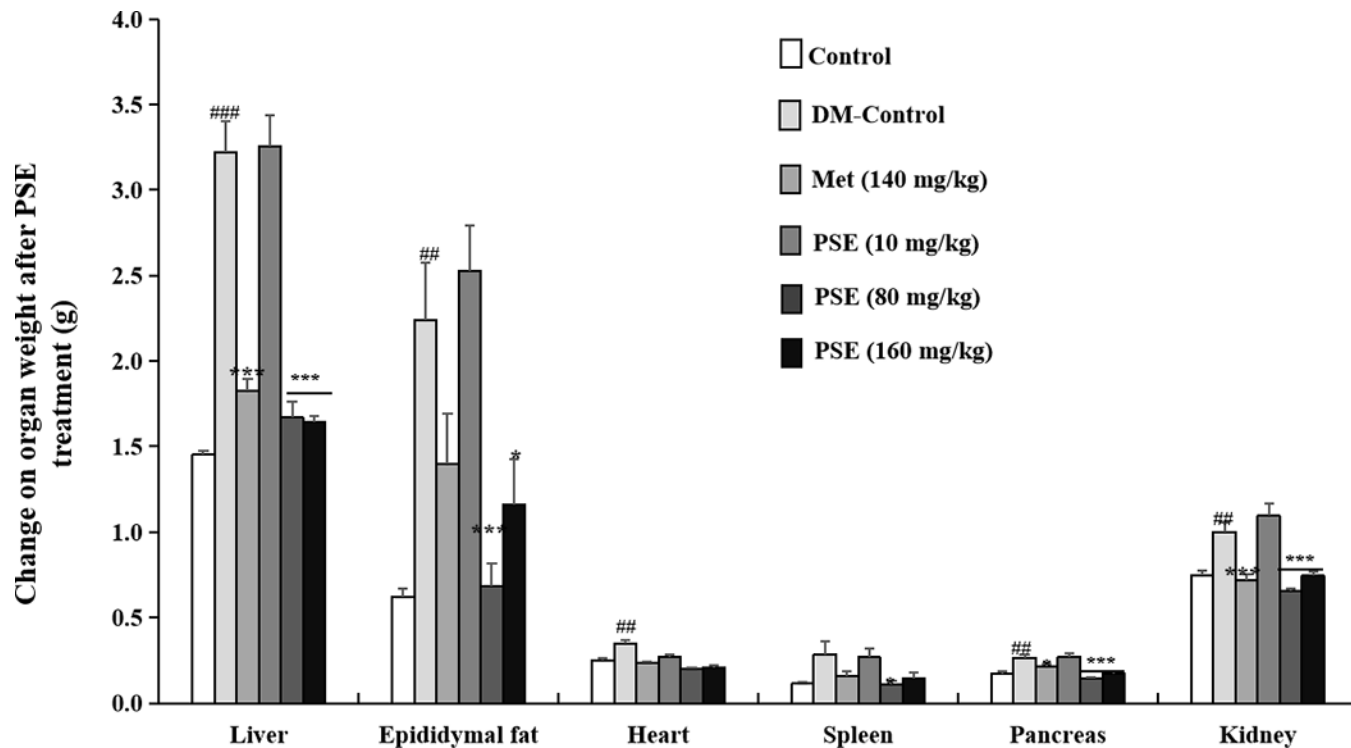

**Supplementary Figure 1. Effect of PSE on the organs weight of type 2 diabetic mice.** Each value was expressed as the mean  $\pm$  SEM of 10 mice. ## and ### represent significant difference comparison with the control group at  $p < 0.01$  and  $p < 0.001$ . \* and \*\*\* indicate significant difference comparison with the DM-C group at  $p < 0.05$ , and  $p < 0.001$ .



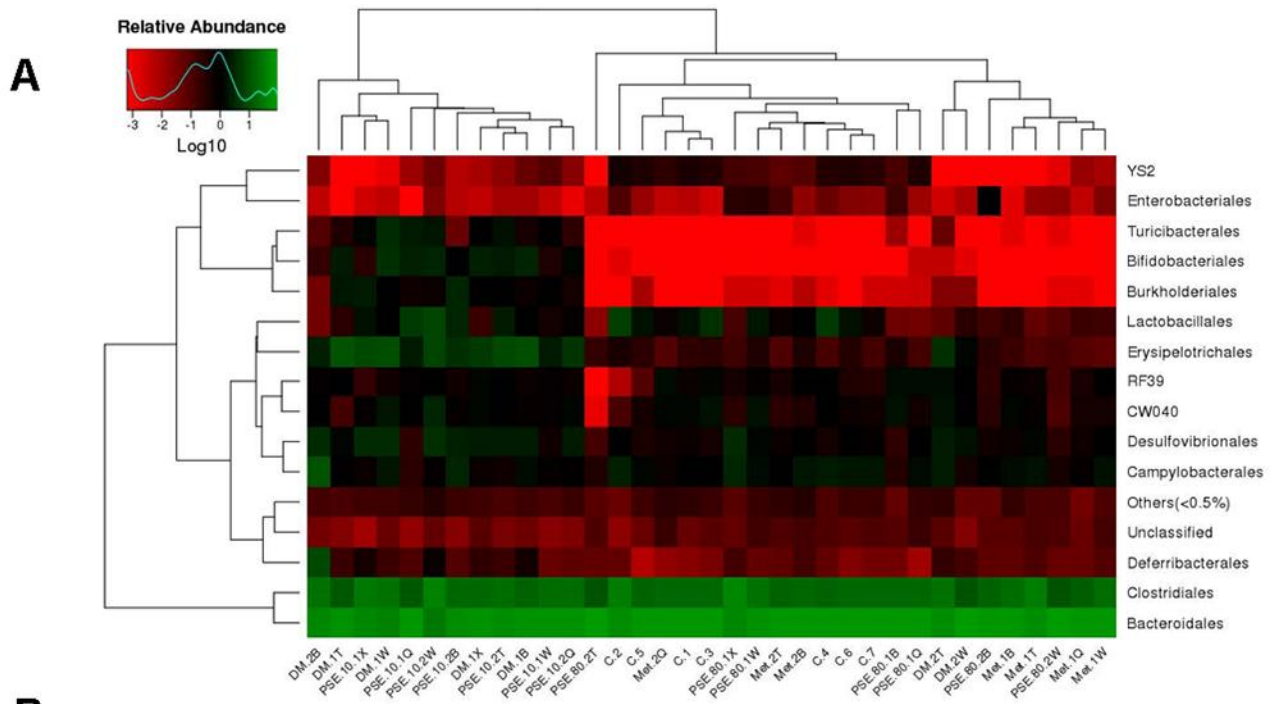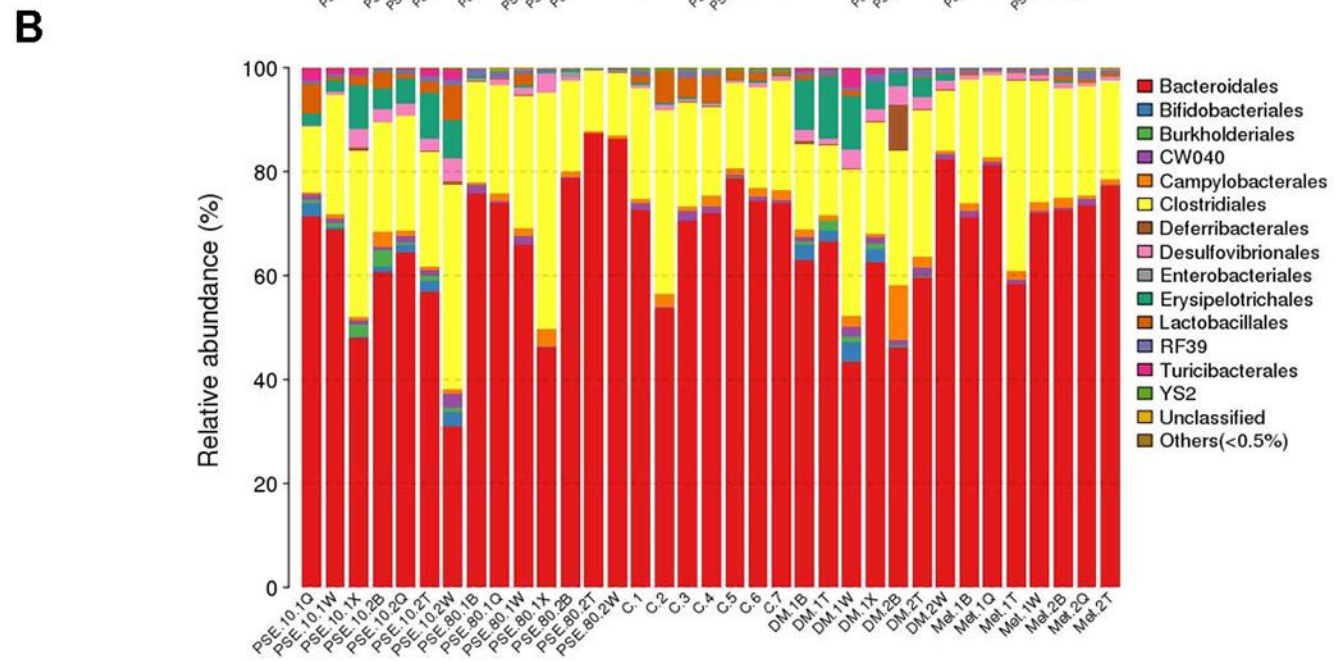

**Supplementary Figure 3. Effect of PSE on gut microflora at order level of type 2 diabetic mice induced by high-fat diet.** Heat map of order level species abundance (A). Histogram of species profiling at order classification level (B). Column height represents relative abundance.

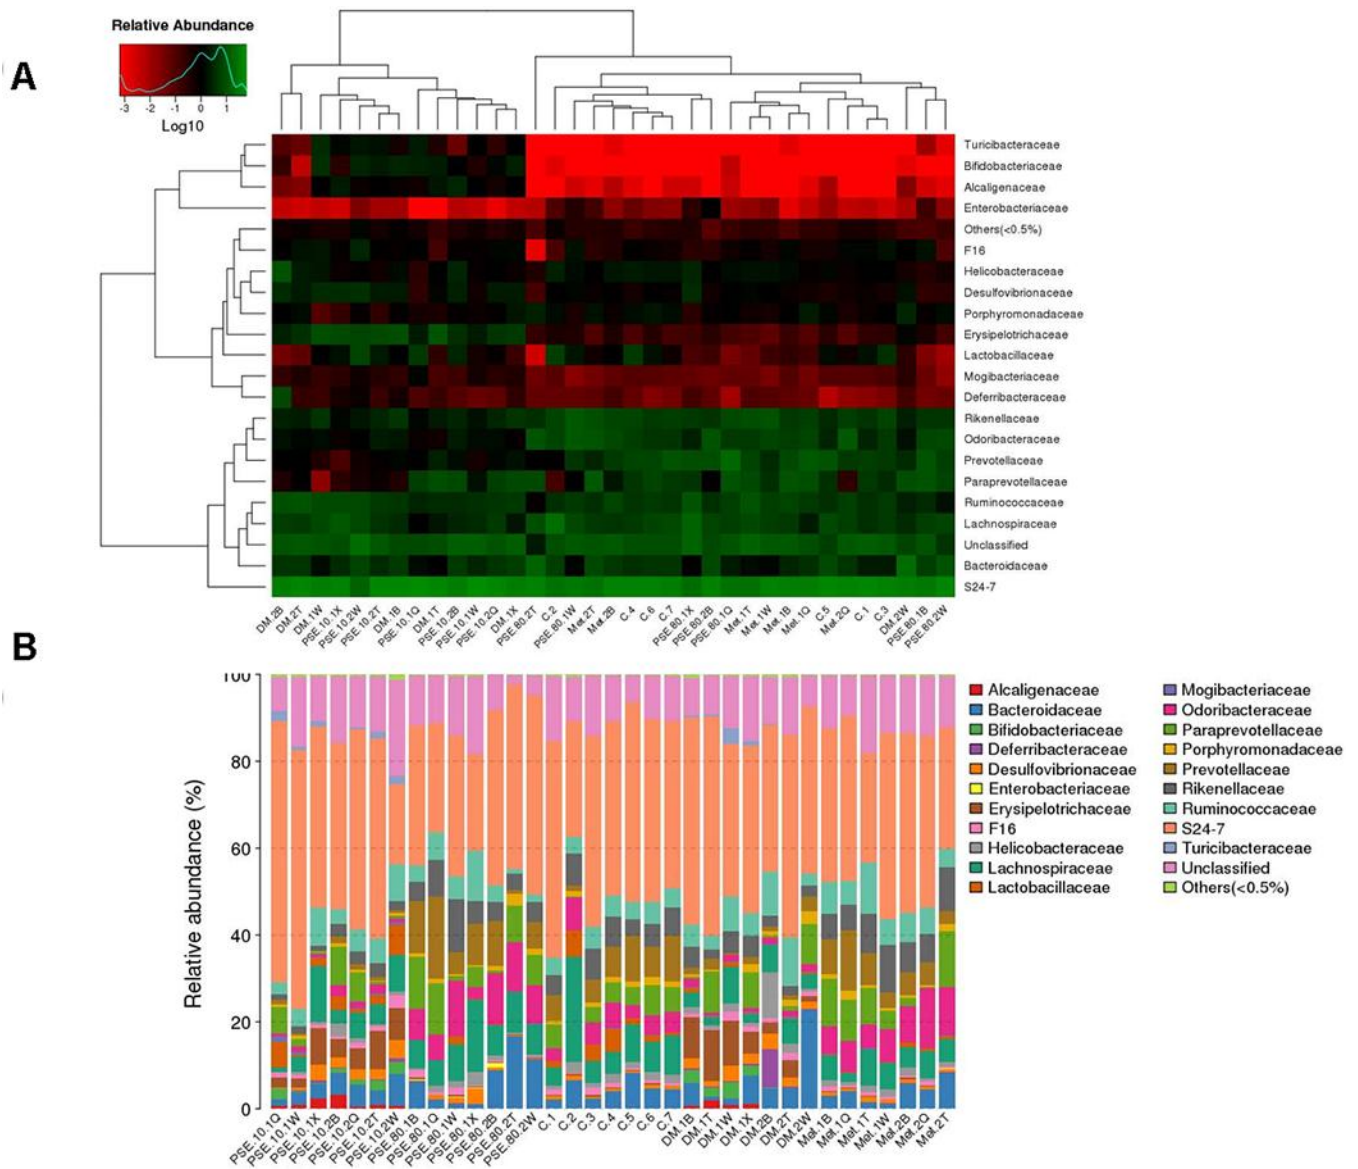

**Supplementary Figure 4. Effect of PSE on gut microflora at family level of type 2 diabetic mice induced by high-fat diet.** Heat map of family level species abundance (A). Histogram of species profiling at order classification level (B). Column height represents relative abundance.

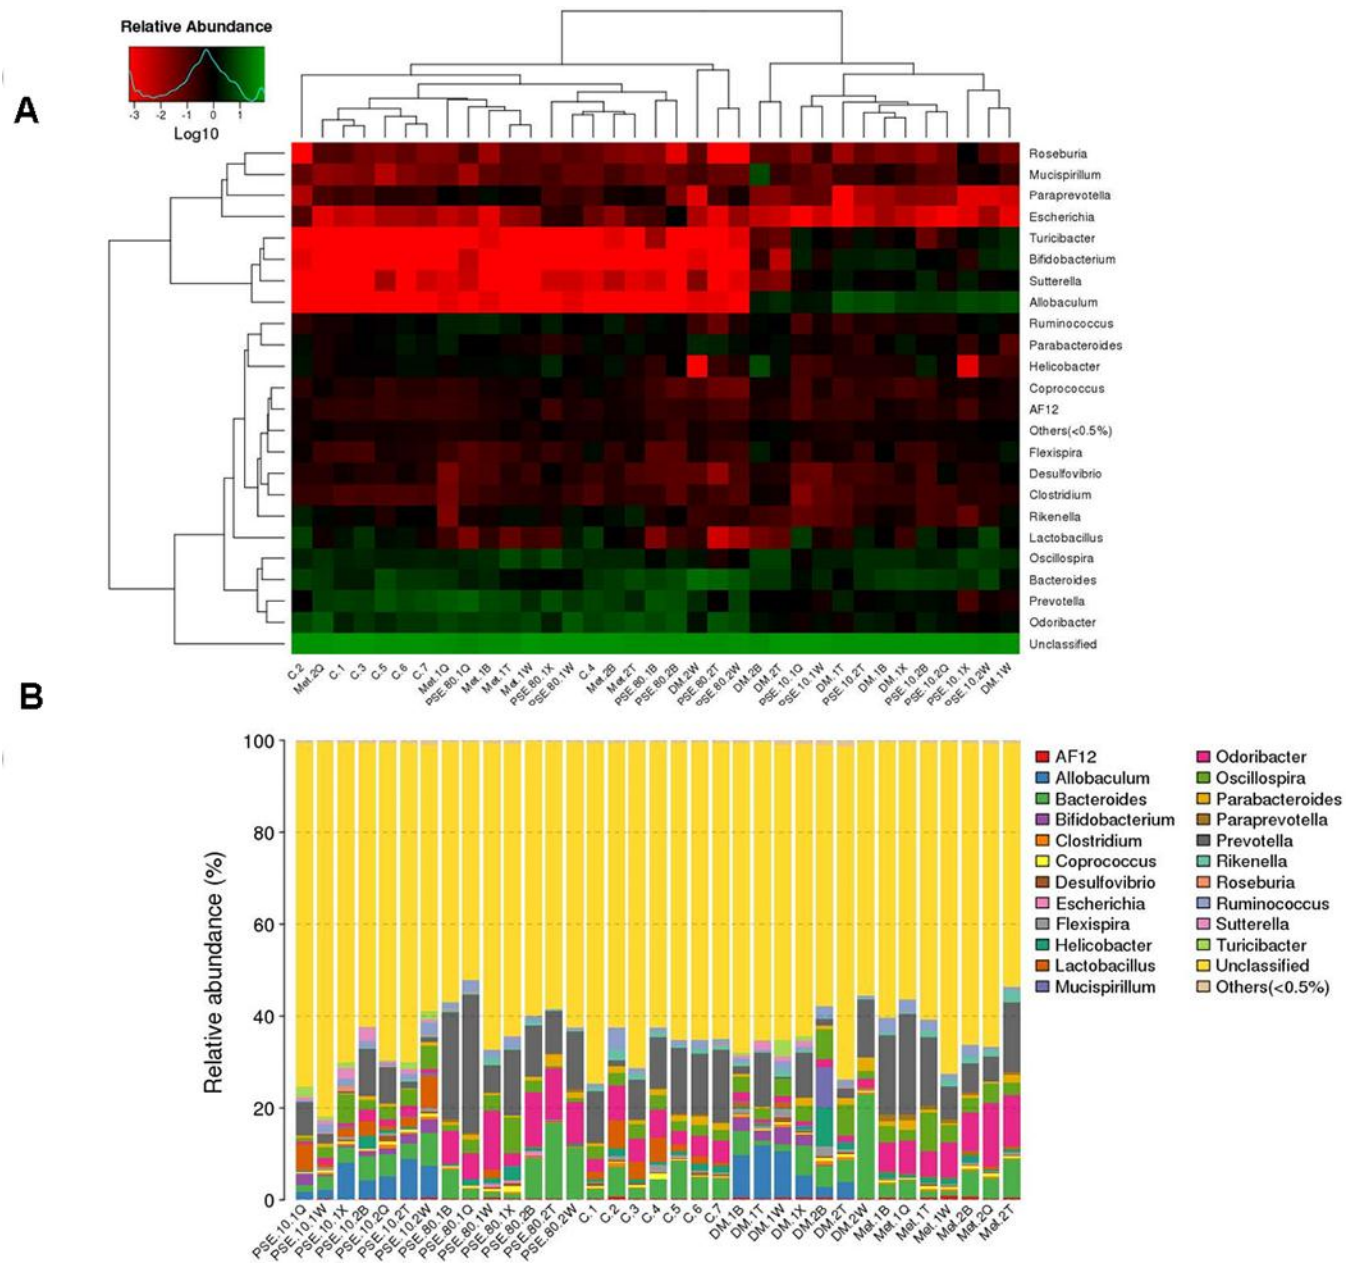

**Supplementary Figure 5. Effect of PSE on gut microflora at genus level of type 2 diabetic mice induced by high-fat diet.** Heat map of genus level species abundance (A). Histogram of species profiling at genus classification level (B). Column height represents relative abundance.

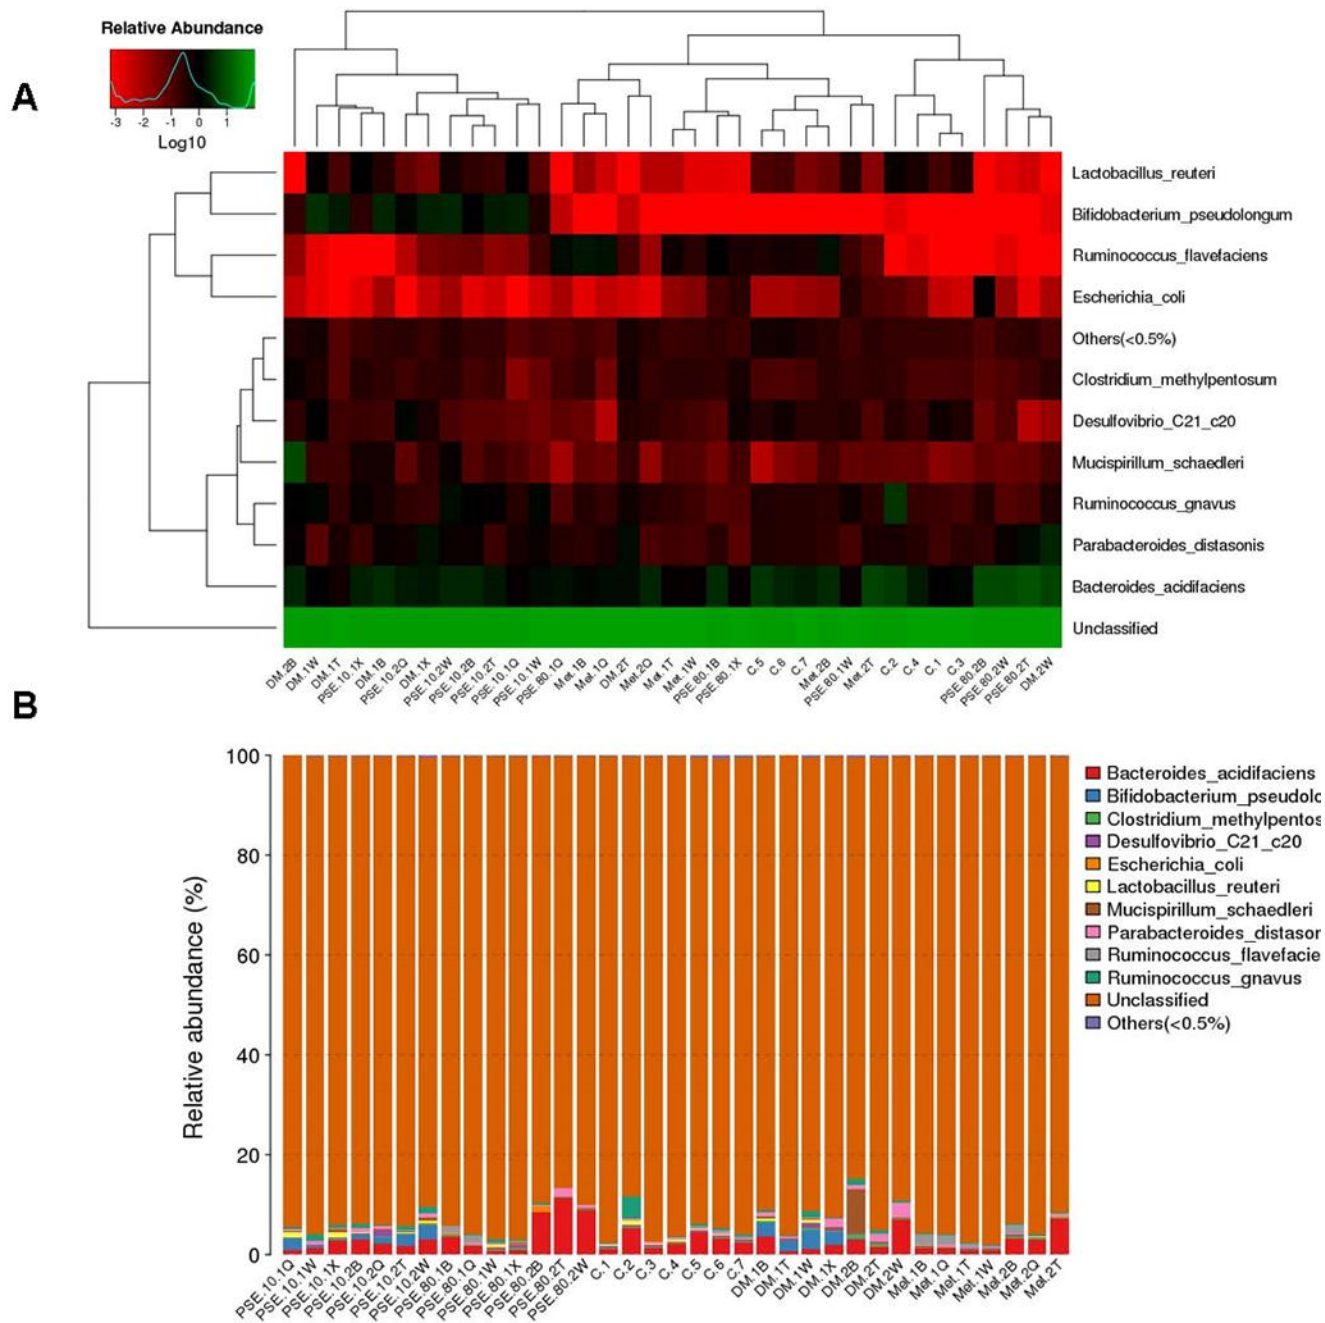

**Supplementary Figure 6. Effect of PSE on gut microflora at species level of type 2 diabetic mice induced by high-fat diet.** Heat map of order level species abundance (A). Histogram of species profiling at order classification level (B). Column height represents relative abundance.

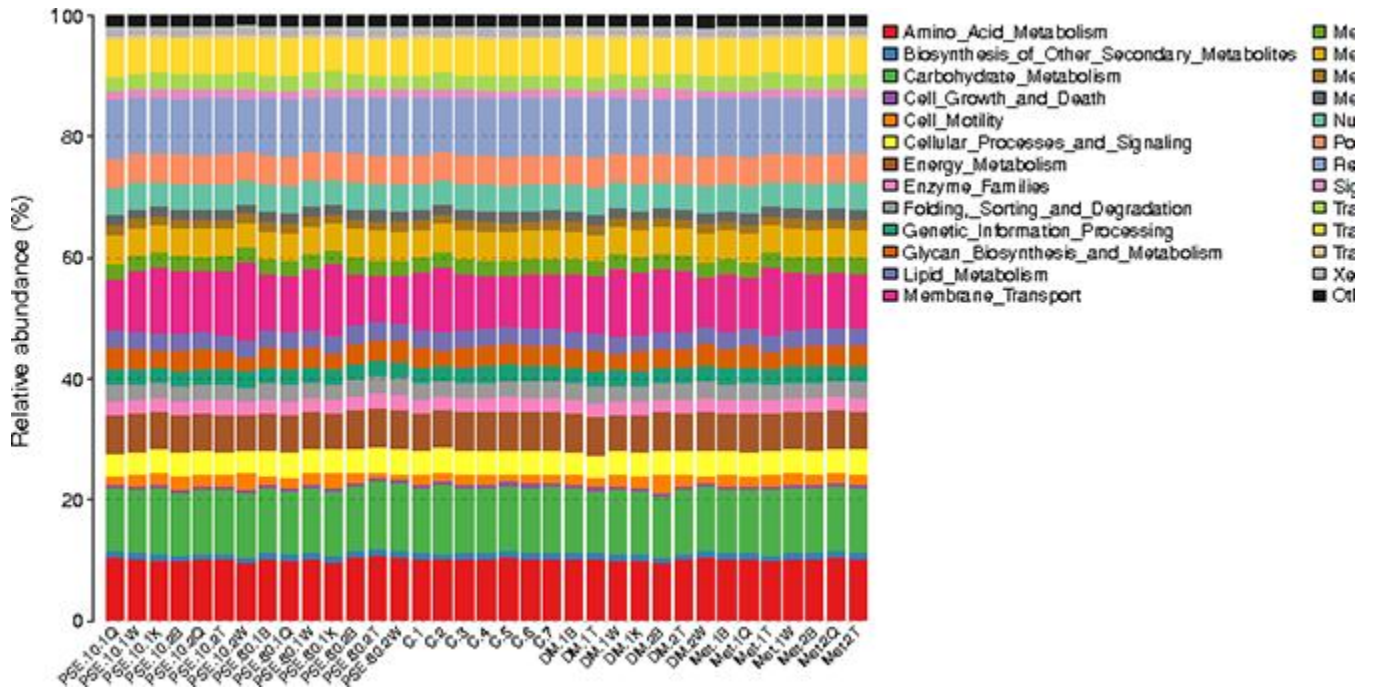

**Supplementary Figure 7. Histogram of species profiling for KEGG pathways at level 2 with PICRUST analysis.** The same colour represented same primary pathway. Column height represents relative abundance.
