# Supplementary material for: Peanut skin extract ameliorates the symptoms of type 2 diabetes mellitus in mice by alleviating inflammation and maintaining gut microbiota homeostasis
Source: publisher site journal article supplement (doi:10.18632/aging.103521), 2020-07-22
Supplement: Supplementary file [file aging-v12i14-103521-supplementary-material-SD3.pdf]

## SUPPLEMENTARY TABLES

**Supplementary Table 1. Primers sequence in RT-PCR analysis of this study.**

| Gene          | Species | Sequences                              |
|---------------|---------|----------------------------------------|
| TNF- $\alpha$ | mouse   | sense: 5'-TAGCCAGGAGGGGAGAACAGA-3'     |
|               | mouse   | anti-sense: 5'-TTTTCTGGAGGGAGATGTGG-3' |
| IL-6          | mouse   | sense: 5'-CCGGAGAGGAGACTTCAC-3'        |
|               | mouse   | anti-sense: 5'-TCCACGATTCCCAGAGA-3'    |
| IL-1 $\beta$  | mouse   | sense: 5'-TTGAAGAAGAGCCCATCCTC-3'      |
|               | mouse   | anti-sense: 5'-CAGCTCATATGGGTCCGAC-3'  |
| IL-10         | mouse   | sense: 5'-GCTCTTACTGACTGGCATGAG-3'     |
|               | mouse   | anti-sense: 5'-CGCAGCTCTAGGAGCATGTG-3' |
| PAI-1         | mouse   | sense: 5'-TCAGCCCTTGCTTGCCTCAT-3'      |
|               | mouse   | anti-sense: 5'-GCATAGCCAGCACCGAGGA-3'  |

**Supplementary Table 2. Effect of PSE on blood biochemical indicators of type 2diabetic mice.**

|                       | ALT(U/L)         | AST(U/L)           | TG(mmol/L)        | TC(mmol/L)        |
|-----------------------|------------------|--------------------|-------------------|-------------------|
| <b>Control</b>        | 31.28 $\pm$ 2.18 | 121.82 $\pm$ 11.34 | 1.41 $\pm$ 0.08   | 3.32 $\pm$ 0.22   |
| <b>DM-Control</b>     | 32.04 $\pm$ 4.36 | 110.09 $\pm$ 31.55 | 2.47 $\pm$ 0.30## | 4.52 $\pm$ 0.27#  |
| <b>MET(140 mg/kg)</b> | 34.41 $\pm$ 3.04 | 99.11 $\pm$ 3.93   | 1.66 $\pm$ 0.10*  | 3.13 $\pm$ 0.24** |
| <b>PSE (80 mg/kg)</b> | 33.81 $\pm$ 2.46 | 110.90 $\pm$ 7.14  | 1.43 $\pm$ 0.15** | 3.46 $\pm$ 0.30*  |

The sample number is 7.

ALT, Alanine aminotransferase; AST, Aspartate aminotransferase; TC, Total cholesterol; TG, Triglycerides, PSE, Peanut skin extract; MET, metformin

##, ### and \*,\*\* represent significant difference compared with the control group at p < 0.01, and p < 0.001, respectively. ### and #### represent significant difference compared with the control group at p < 0.01, and p < 0.001, respectively. \* and \*\* indicate significant difference compared with the DM group at p < 0.05, p < 0.01, respectively.

**Supplementary Table 3. The sample OTU statistics of faeces of diabetic mice after treatment PSE and metformin.**

| <b>Sample Name</b> | <b>Tag Number</b> | <b>OTU Number</b> |
|--------------------|-------------------|-------------------|
| C.1                | 74670             | 545               |
| C.2                | 73564             | 401               |
| C.3                | 71312             | 534               |
| C.4                | 71872             | 543               |
| C.5                | 73304             | 508               |
| C.6                | 72836             | 550               |
| C.7                | 70953             | 564               |
| DM.1B              | 75035             | 542               |
| DM.1T              | 75490             | 485               |
| DM.1W              | 76799             | 512               |
| DM.1X              | 73047             | 520               |
| DM.2B              | 73409             | 538               |
| DM.2T              | 74625             | 562               |
| DM.2W              | 71626             | 418               |
| MET.1B             | 68754             | 546               |
| MET.1Q             | 72398             | 459               |
| MET.1T             | 73173             | 568               |
| MET.1W             | 73552             | 557               |
| MET.2B             | 71234             | 522               |
| MET.2Q             | 71195             | 502               |
| MET.2T             | 72345             | 514               |
| PSE.10.1Q          | 74698             | 460               |
| PSE.10.1W          | 74063             | 529               |
| PSE.10.1X          | 72384             | 483               |
| PSE.10.2B          | 71702             | 506               |
| PSE.10.2Q          | 74663             | 543               |
| PSE.10.2T          | 71050             | 561               |
| PSE.10.2W          | 70903             | 564               |
| PSE.80.1B          | 71278             | 434               |
| PSE.80.1Q          | 70671             | 496               |
| PSE.80.1W          | 73085             | 540               |
| PSE.80.1X          | 73783             | 530               |
| PSE.80.2B          | 73167             | 391               |
| PSE.80.2T          | 73783             | 280               |
| PSE.80.2W          | 69909             | 397               |

\* The sample numbers of each group are 7; C, DM, MET and PSE represented control group, diabetic group, metformin-treated group, PSE-treated group.
